# Supplementary material for: Solid-state vibrational spectroscopic investigation of cocrystals and salt of indomethacin
Source: Royal Society of Chemistry journal article supplement (doi:10.1039/c2ce25801c), 2012-01-01
Supplement: c2ce25801c.pdf [file c2ce25801c.pdf]

## **Solid-state Vibrational Spectroscopic Investigation of Cocrystal and Salt of Indomethacin**

Hassan Refat H. Ali<sup>1</sup>, Amjad Alhalaweh<sup>1</sup>, N. F.C. Mendes<sup>2</sup>, Paulo Ribeiro-Claro<sup>2</sup>  
and Sitaram P. Velaga<sup>1</sup>, \*

<sup>1</sup>Pharmaceutical Materials Research Group, Department of Health Sciences, Luleå  
University of Technology, Luleå, 97187, Sweden.

<sup>2</sup>Department of Chemistry, CICECO, University of Aveiro, 3810-193 Aveiro, Portugal.

*\*Corresponding author:* Sitaram P. Velaga, Department of Health Sciences, Luleå  
University of Technology, Luleå, SE-971 87, Sweden; email: [sitaram.velaga@ltu.se](mailto:sitaram.velaga@ltu.se)

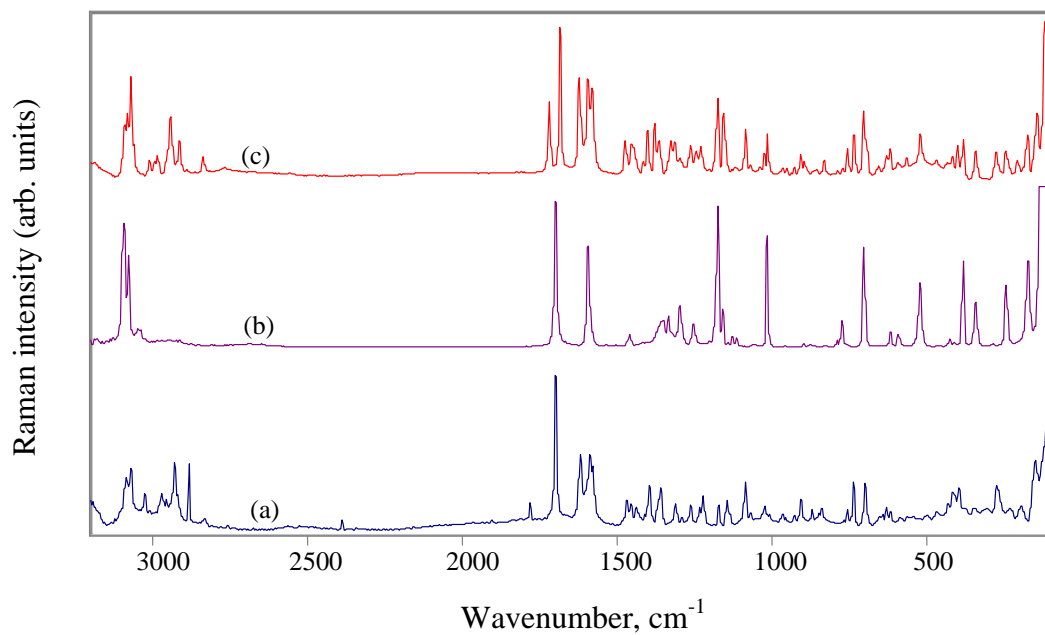

Figure I. Baseline corrected Raman spectra of (a) IND, (b) SAC and (c) IND-SAC in the region of (150-3200 cm<sup>-1</sup>)

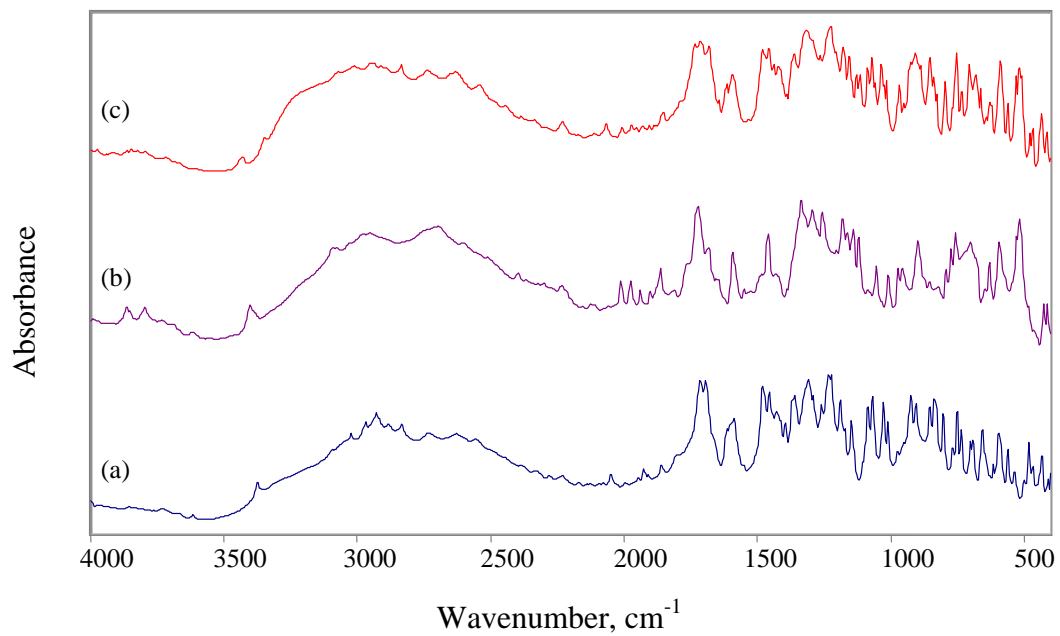

Figure II. IR spectra of (a) IND, (b) SAC and (c) IND-SAC in the region of (400-4000) cm<sup>-1</sup>)

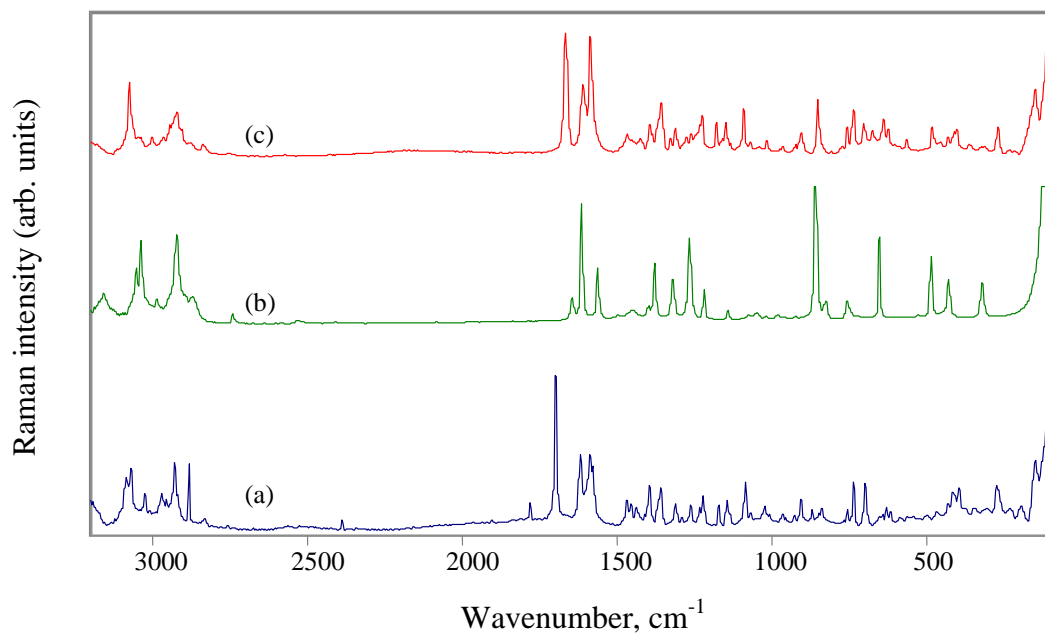

Figure III. Baseline corrected Raman spectra of (a) IND, (b) AMP and (c) IND-AMP in the region of (150-3200 cm<sup>-1</sup>)

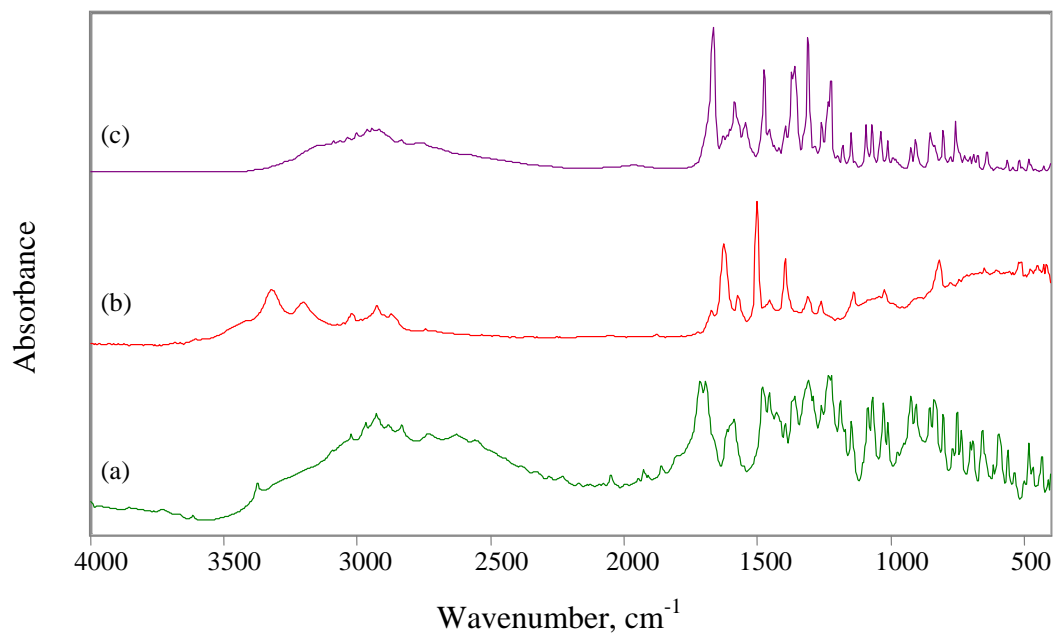

Figure IV. IR spectra of (a) IND, (b) AMP and (c) IND-AMP in the region of (400-4000 cm<sup>-1</sup>)

Table I. Vibrational wavenumbers of IND, IND-SAC and SAC

| IND        |           | IND-SAC |            | SAC        |           | Proposed Assignment                                   |
|------------|-----------|---------|------------|------------|-----------|-------------------------------------------------------|
| IR         | Raman     | IR      | Raman      | IR         | Raman     |                                                       |
|            |           | 3430 mw |            | 3402 mw    |           | $\nu(\text{NH})$                                      |
| 3370 w     |           | 3346 w  |            |            |           | $\nu(\text{OH})$                                      |
|            | 3084 ms   |         | 3088 ms    |            | 3091 s    | $\nu(\text{CH})$                                      |
|            |           |         | 3078 ms    |            | 3076 m    | $\nu(\text{CH})$                                      |
|            | 3067 ms   |         | 3067 s     |            |           | $\nu(\text{CH})$                                      |
|            |           |         | 3062 m,sh  |            |           | $\nu(\text{CH})$                                      |
|            |           |         |            |            | 3040 w,br | $\nu_{\text{as}}(\text{CH}_2)$                        |
|            | 3024 mw   |         |            |            |           | $\nu_{\text{as}}(\text{CH}_2)$                        |
|            |           |         | 3009 mw    |            |           | $\nu(\text{CH}_2)$                                    |
|            |           |         | 2987 mw,sh |            |           | $\nu(\text{C}=\text{CH})$                             |
|            | 2973 w,sh |         | 2980 m     |            |           | combination: $\nu(\text{CH})$ and $\nu(\text{OH})$    |
|            | 2966 mw   |         |            |            |           | combination: $\nu(\text{CH})$ and $\nu(\text{OH})$    |
|            | 2953 w    |         | 2946 m,sh  |            |           | combination: $\nu(\text{CH})$ and $\nu(\text{OH})$    |
|            | 2928 s    |         | 2940 ms    |            |           | $\nu(\text{CH}_3)$                                    |
|            | 2918 m,sh |         | 2912 m     |            |           | C-C ring modes                                        |
|            | 2880 s    |         |            |            |           | combination: (C=O) in-plane and C-C ring modes        |
|            | 2832 w    |         | 2832 m     |            |           | combination: (C=O) in-plane and C-C ring modes        |
|            | 1782 w    |         |            |            |           |                                                       |
|            |           | 1736 s  |            | 1720 s     |           | $\nu(\text{C}=\text{O})$                              |
| 1713 s     |           | 1710 s  | 1717 s     |            |           | $\nu(\text{C}=\text{O})$ of the carboxylic acid dimer |
| 1691 s     | 1698 s    |         |            | 1696 ms,sh | 1698 s    | $\nu(\text{C}=\text{O})$                              |
|            |           | 1682 s  | 1684 vs    |            |           | $\nu(\text{C}=\text{O})$                              |
|            |           | 1644 mw |            | 1644 m,sh  |           | $\nu(\text{C}=\text{O})$                              |
| 1613 ms,sh | 1620 s    | 1613 ms | 1622 s     | 1628 w,sh  |           | $\nu(\text{C}=\text{C})$                              |
| 1592 ms,sh | 1590 s    | 1592 ms | 1594 s     | 1592 ms    | 1594 s    | $\nu(\text{C}-\text{C})_{\text{ring}}$                |

Table I. Vibrational wavenumbers of IND, IND-SAC and SAC (cont.)

| IND        |           | IND-SAC    |            | SAC         |            | Proposed Assignment                         |
|------------|-----------|------------|------------|-------------|------------|---------------------------------------------|
| IR         | Raman     | IR         | Raman      | IR          | Raman      |                                             |
|            | 1579 s    |            | 1579 s     |             |            | $\nu(\text{C-C})_{\text{ring}}$             |
| 1548 w,sh  |           |            |            | 1548 w      |            | $\delta(\text{CCC})$                        |
| 1479 s     | 1466 m    | 1479 s     | 1472 m     | 1479 mw,sh  | 1466 w     | $\delta(\text{CCH})$                        |
| 1455 s     | 1456 m    | 1455 s     | 1456 m,br  | 1459 s      | 1456 w     | $\nu(\text{C-C})_{\text{ring}}$             |
| 1437 ms,sh | 1440 mw   | 1437 ms    |            | 1437m,sh,br |            | $\delta(\text{CH})$                         |
| 1420 m,br  | 1412 vw   | 1420 m,br  | 1412 w     |             |            | $\nu(\text{C-N})$                           |
|            |           | 1405 m,sh  | 1401 m     |             |            | $\delta(\text{O-H})$                        |
| 1394 mw    | 1396 ms   | 1394 w     |            | 1394 w      |            | $\nu(\text{C-N})$                           |
|            |           |            | 1378 m     |             |            | $\delta(\text{CH}_3)$                       |
| 1364 ms,br | 1365 m,sh | 1364 ms,br | 1365 m     | 1364 m,sh   | 1365 mw,br | $\delta(\text{CH}_2)$                       |
|            | 1359 ms   |            |            |             |            | $\delta(\text{CH}_2)$                       |
|            |           |            | 1333 mw,sh |             | 1333 mw    | $\nu(\text{CC})$                            |
|            |           |            | 1326 m     |             | 1326 w,sh  | $\nu(\text{CC})$                            |
| 1319 s,br  |           | 1319 s,br  |            |             |            | in-plane $\delta(\text{CH})$                |
|            | 1311 m    |            | 1313 m     |             |            | in-plane $\delta(\text{CH})$                |
| 1289 ms,sh | 1287 vw   | 1294 ms,sh | 1296 w     | 1294 ms     | 1296 mw    | in-plane $\delta(\text{COOH})$              |
|            |           | 1278 w,sh  |            | 1278 ms,sh  |            | $\nu_{\text{as}}(\text{SO}_2)$              |
| 1260 mw    | 1261 m    | 1264 w     | 1261 mw    |             | 1253 w     | in-plane $\delta(\text{C=O})$               |
| 1232 s     | 1234 m    | 1232 mw,sh | 1242 mw    |             |            | $\nu(\text{C-OH})$                          |
| 1223 s     | 1219 ms   | 1223 s     | 1226 mw    |             |            | in-plane $\delta(\text{CH})$                |
|            |           | 1203 m,sh  |            | 1203 w      |            |                                             |
| 1189 ms    |           |            |            |             |            | $\delta(\text{CH}_2)$ wagging mode          |
| 1178 m,sh  | 1171 m    | 1178 ms    | 1174 s     | 1178 ms     | 1174 s     | $\delta(\text{CH})$ rocking mode            |
|            |           | 1157 ms    | 1157 ms    | 1162 m      | 1156 mw    | $\nu(\text{SO}_2)$ and $\delta(\text{CSN})$ |
| 1148 ms    | 1147 ms   | 1146 mw,sh |            |             |            | $\delta(\text{CH})$ twisting mode           |

Table I. Vibrational wavenumbers of IND, IND-SAC and SAC (cont.)

| IND        |            | IND-SAC    |           | SAC       |         | Proposed Assignment                            |
|------------|------------|------------|-----------|-----------|---------|------------------------------------------------|
| IR         | Raman      | IR         | Raman     | IR        | Raman   |                                                |
| 1137 mw,sh | 1137 mw,sh |            |           | 1137 m    |         | in-plane $\delta(\text{CH})$                   |
|            |            | 1129 m     |           |           | 1127 w  | $\nu(\text{CC})$                               |
|            |            | 1118 m     | 1115 w    | 1118 m    | 1115 w  | $\nu(\text{C-N})$                              |
| 1107 w,sh  |            | 1107 vw,sh |           |           |         | in-plane $\delta(\text{CC})$                   |
| 1087 s     | 1089 s     | 1087 ms    | 1089 ms   | 1087 vw   |         | $\delta(\text{CCC})$                           |
| 1068 s     | 1068 w     | 1071 s     | 1071 w    |           |         | $\delta(\text{CH})$ rocking mode               |
|            |            | 1058 m,sh  |           | 1058 m    |         | $\nu(\text{C-S})$                              |
|            |            | 1036 s     | 1042 w    | 1036 w,sh |         | $\delta(\text{CH})$                            |
| 1028 s     | 1030 w,sh  | 1028 m,sh  | 1025 mw   |           |         | $\nu(\text{C-OH})$                             |
| 1015 ms    | 1020 mw    | 1016 ms    | 1016 ms   |           | 1016 ms | $\delta(\text{CCC})$                           |
|            | 1005 w     | 1011 mw,sh |           |           |         | $\nu_{\text{as}}(\text{C-OH})$                 |
| 974 vw,sh  |            | 974 w,sh   | 972 w,sh  | 974 m     |         | out-of-plane $\delta(\text{CH})$               |
|            | 969 mw     | 968 ms     | 969 w     |           |         | out-of-plane $\delta(\text{CH})$               |
| 950 vw,sh  | 954 w      | 950 w      | 953 w     | 950 m     |         | $\delta(\text{C-C-C})$                         |
| 927 s      | 930 mw     | 927 ms,sh  | 927 w     |           |         | out-of-plane $\delta(\text{COOH})$             |
|            |            | 910 s      | 910 mw    |           |         | out-of-plane $\delta(\text{C=O})$              |
| 906 ms     | 907 ms     | 906 ms,sh  |           |           |         |                                                |
|            |            | 898 ms,sh  | 894 w     | 898 ms    |         |                                                |
|            | 871 mw     | 885 ms,sh  | 885 vw,sh | 885 mw,sh |         |                                                |
| 854 ms     | 850 w      | 854 s      | 860 w,br  | 854 vw    |         |                                                |
| 835 ms     | 835 vw     | 835 ms     | 835 vw,sh |           |         | out-of-plane $\delta(\text{CH})_{\text{ring}}$ |
|            |            | 828 m      | 828 w     | 828 vw    |         | out-of-plane $\delta(\text{CH})_{\text{ring}}$ |
| 801 ms     |            | 797 ms     |           |           |         | $\delta(\text{C-H})$ rocking mode              |
|            |            | 793 ms,sh  | 789 vw    | 793 mw    | 789 vw  | $\delta(\text{C-H})$ rocking mode              |
| 769 w      | 766 vw     | 769 mw,sh  | 774 vw    | 774 mw    | 774 mw  | out-of-plane $\delta(\text{CH})_{\text{ring}}$ |



Table I. Vibrational wavenumbers of IND, IND-SAC and SAC (cont.)

| IND      |        | IND-SAC   |          | SAC        |        | Proposed Assignment                         |
|----------|--------|-----------|----------|------------|--------|---------------------------------------------|
| IR       | Raman  | IR        | Raman    | IR         | Raman  |                                             |
| 753 ms   | 753 mw | 757 ms    | 755 mw   | 757 mw     |        | ring torsion                                |
|          | 738 s  | 737 mw    | 738 mw   |            |        | out-of-plane $\delta(\text{COOH})$          |
|          |        |           |          | 716 m,br   |        | $\nu(\text{CC})$                            |
| 701 m    | 702 s  | 701 ms    | 702 m    | 701 m      | 702 m  | ring torsion                                |
| 691 m    |        | 681 m     | 697 m,sh | 691m,sh,br |        | ring torsion                                |
| 657 ms   | 653 w  | 664 m     | 658 w    |            |        | out-of-plane $\delta(\text{C-H})$           |
| 649 m,sh | 641 w  | 642 vw    |          | 649 vw     |        | out-of-plane $\delta(\text{C-H})$           |
| 629 vw   | 629 mw | 629 mw,br | 629 w    | 629 m      |        | in-plane ring deformation mode              |
| 615 w    | 617 mw |           | 617 mw   |            | 617 w  | $\delta(\text{CCC})_{\text{ring}}$          |
| 596 m,br |        | 596 m,sh  | 593 w    |            | 593 w  | $\delta(\text{CCC})_{\text{ring}}$          |
|          |        | 591 s     |          | 591 ms     |        | $\delta(\text{SO}_2)$                       |
|          | 586 w  | 578 mw,sh |          | 578 w,sh   |        |                                             |
| 563 m    | 562 w  | 563 m     | 566 w    |            |        | in-plane $\delta(\text{CCN})$               |
| 537 mw   | 543 w  |           |          | 537 w,sh   |        | $\delta(\text{CCC})$                        |
|          |        | 529 s     | 523 mw   | 529 ms     | 523 mw | $\delta(\text{CNS})$                        |
|          | 520 vw | 517 s     |          | 517 s      |        | out-of-plane $\delta(\text{CC})$            |
|          |        | 512 s,sh  |          |            |        | out-of-plane $\delta(\text{CC})$            |
| 496 w,sh | 499 w  |           |          | 491 w,sh   |        | in-plane $\delta(\text{CC})_{\text{chain}}$ |
| 483 ms   | 480 vw | 483 mw    |          |            |        | ring torsion                                |
| 469 mw   | 469 w  | 469 mw    | 469 w    | 469 w,sh   |        | ring torsion                                |
| 432 m    | 430 w  | 432 m     | 432 w    | 428 mw     | 430 vw | out-of-plane $\delta(\text{CCC})$           |
| 413 w    | 418 ms | 413 mw    | 418 w    | 413 mw     |        | out-of-plane $\delta(\text{CCC})$           |
|          | 399 ms |           | 399 mw   |            |        | ring deformation                            |
|          |        |           | 384 mw   |            | 384 m  | ring deformation                            |
|          | 351 w  |           | 344 mw   |            | 344 mw | ring deformation                            |

Table I. Vibrational wavenumbers of IND, IND-SAC and SAC (cont.)

| IND |        | IND-SAC |        | SAC |        | Proposed Assignment  |
|-----|--------|---------|--------|-----|--------|----------------------|
| IR  | Raman  | IR      | Raman  | IR  | Raman  |                      |
|     | 308 w  |         |        |     |        |                      |
|     | 269 s  |         | 276 mw |     |        | (CH <sub>3</sub> )τ  |
|     | 230 mw |         | 243 mw |     | 243 mw | skeletal deformation |
|     | 196 m  |         | 206 w  |     |        | skeletal deformation |
|     |        |         | 174 m  |     | 174 m  | skeletal deformation |
|     | 147 s  |         | 147 m  |     |        | skeletal deformation |
|     |        |         |        |     | 135 ms |                      |
|     |        |         | 121 s  |     | 121 s  |                      |

br, m, s, sh, w and v stand for broad, medium, strong, shoulder, weak and very, respectively and  $\nu$ ,  $\delta$  and  $\tau$  stand for stretching, deformation and torsional respectively.

Table II. Vibrational wavenumbers of IND, AMP-IND and AMP

| IND    |           | AMP-IND |            | AMP        |           | Proposed Assignment                                   |
|--------|-----------|---------|------------|------------|-----------|-------------------------------------------------------|
| IR     | Raman     | IR      | Raman      | IR         | Raman     |                                                       |
|        |           |         |            | 3388 s,sh  |           | hydrogen-bonded $\nu_{as}(\text{NH}_2)$               |
| 3370 w |           |         |            |            |           | $\nu(\text{OH})$                                      |
|        |           |         |            | 3318 s,br  |           | hydrogen-bonded $\nu_{as}(\text{NH}_2)$               |
|        |           |         |            | 3200 m     |           | hydrogen-bonded $\nu_{as}(\text{NH}_2)$               |
|        |           |         |            |            | 3157 m    | hydrogen-bonded $\nu_{as}(\text{NH}_2)$               |
|        |           |         | 3112 vw    |            |           | $\nu(\text{NH}^+)$                                    |
|        | 3084 ms   |         | 3072 s     | 3074 vw    |           | $\nu(\text{CH})$                                      |
|        | 3067 ms   |         | 3064 m,sh  | 3052 vw    | 3050 ms   | $\nu(\text{CH})$                                      |
|        |           |         | 3040 mw,br |            | 3035 s    | $\nu(\text{CH})$                                      |
|        | 3024 mw   |         |            | 3017 mw    |           | $\nu(\text{CH})$                                      |
|        |           |         | 3001 mw    |            |           | $\nu(\text{CH})$                                      |
|        | 2973 w,sh |         |            |            | 2981 w    | $\nu_{as}(\text{CH}_3)$                               |
|        | 2966 mw   |         | 2963 mw    |            |           | $\nu(\text{CH})$                                      |
|        | 2953 w    |         | 2943 m     |            | 2939 w,sh | $\nu_{as}(\text{CH}_3)$                               |
|        | 2928 s    |         |            | 2927 mw    |           | $\nu(\text{CH}_3)$                                    |
|        | 2918 m,sh |         | 2920 ms    |            | 2920 s    | $\nu_{as}(\text{CH}_3)$                               |
|        |           |         | 2903 m     | 2898 vw,sh |           | $\nu(\text{CH}_3)$                                    |
|        | 2880 s    |         | 2877 mw,br | 2870 w     | 2870 mw   | $\nu(\text{CH}_3)$                                    |
|        |           |         |            |            |           | $\nu(\text{CH}_3)$                                    |
|        | 2832 w    |         | 2834 mw    |            |           | combination: (C=O) in-plane and C-C ring modes        |
|        |           |         | 2748 vw,br |            | 2738 w    |                                                       |
|        | 1782 w    |         |            |            |           |                                                       |
| 1713 s |           |         |            |            |           | $\nu(\text{C}=\text{O})$ of the carboxylic acid dimer |
| 1691 s | 1698 s    |         |            |            |           | Benzoyl $\nu(\text{C}=\text{O})$                      |
|        |           | 1665 vs | 1665 vs    |            |           | Benzoyl $\nu(\text{C}=\text{O})$                      |

Table II. Vibrational wavenumbers of IND, AMP-IND and AMP (cont.)

| IND        |           | AMP-IND    |            | AMP       |           | Proposed Assignment                                |
|------------|-----------|------------|------------|-----------|-----------|----------------------------------------------------|
| IR         | Raman     | IR         | Raman      | IR        | Raman     |                                                    |
|            |           |            |            |           | 1645 mw   | $\delta(\text{NH}_2)$ and $\nu(\text{C}=\text{C})$ |
| 1613 ms,sh | 1620 s    | 1628 w     |            | 1623 s,br | 1613 s    | $\nu(\text{C}=\text{C})$                           |
|            |           |            | 1611 s     |           |           | $\nu(\text{COO}^-)$                                |
| 1592 ms,sh | 1590 s    | 1588 m     | 1588 vs    |           |           | $\nu(\text{C}-\text{C})_{\text{ring}}$             |
|            |           |            |            |           | 1563 m    | $\delta(\text{NH}_2)$ and $\nu(\text{C}=\text{C})$ |
|            | 1579 s    | 1572 w,sh  |            | 1572 mw   |           | $\nu(\text{C}-\text{C})_{\text{ring}}$             |
| 1548 w,sh  |           |            |            |           |           | $\delta(\text{CCC})$                               |
|            |           |            |            | 1501 vs   |           | $\delta(\text{CH}_3)$                              |
|            |           | 1483 mw,sh |            |           |           | $\delta(\text{NH}^+)$                              |
| 1479 s     |           | 1474 ms    | 1475 vw,sh |           |           | $\delta(\text{CCH})$                               |
|            | 1466 m    |            | 1465 w     |           |           | $\delta(\text{CCH})$                               |
| 1455 s     | 1456 m    | 1454 w     |            | 1454 vw   | 1450 w,br | $\nu(\text{C}-\text{C})_{\text{ring}}$             |
| 1437 ms,sh | 1440 mw   | 1434 w     |            |           |           | $\delta(\text{CH})$                                |
| 1420 m,br  | 1412 vw   | 1417 w     | 1426 w     |           |           | $\nu(\text{C}-\text{N})$                           |
| 1394 mw    | 1396 ms   | 1399 w,sh  | 1396 mw    | 1394 ms   | 1398 w    | $\nu(\text{C}-\text{N})$                           |
|            |           |            |            |           | 1377 ms   | $\delta(\text{CH}_3)$                              |
|            |           | 1370 ms    |            |           |           | $\nu_{\text{as}}(\text{COO}^-)$                    |
| 1364 ms,br | 1365 m,sh |            |            |           |           | $\delta(\text{CH}_2)$                              |
|            | 1359 ms   | 1358 ms    | 1357 m     |           |           | $\delta(\text{CH}_2)$                              |
| 1319 s,br  |           | 1322 w,sh  | 1329 w     |           | 1321 m    | in-plane $\delta(\text{CH})$                       |
|            | 1311 m    | 1310 s     | 1310 mw    | 1310 w    |           | in-plane $\delta(\text{CH})$                       |
| 1289 ms,sh | 1287 vw   | 1287 w,sh  |            |           |           | $\nu(\text{C}-\text{C})$                           |
|            |           |            | 1275 w     |           |           | $\nu(\text{COO}^-)$                                |
| 1260 mw    | 1261 m    | 1261 mw    | 1260 vw    | 1261 w    | 1265 ms   | $\delta(\text{C}-\text{N})$                        |
| 1232 s     | 1234 m    |            |            |           |           | $\nu(\text{C}-\text{C H}_3)$                       |

Table II. Vibrational wavenumbers of IND, AMP-IND and AMP (cont.)

| IND        |            | AMP-IND   |            | AMP       |         | Proposed Assignment                                                 |
|------------|------------|-----------|------------|-----------|---------|---------------------------------------------------------------------|
| IR         | Raman      | IR        | Raman      | IR        | Raman   |                                                                     |
|            |            | 1232 s    |            |           |         | in-plane $\delta$ (COO <sup>-</sup> )                               |
|            |            |           | 1226 mw    |           |         | in-plane $\delta$ (COO <sup>-</sup> )                               |
| 1223 s     | 1219 ms    | 1223 s    |            |           | 1220 mw | in-plane $\delta$ (CH)                                              |
| 1189 ms    |            | 1198 vw   |            |           |         | $\delta$ (CH <sub>2</sub> ) wagging mode                            |
| 1178 m,sh  | 1171 m     | 1178 mw   | 1178 mw    |           |         | $\delta$ (CH) rocking mode                                          |
|            |            |           | 1155 w,sh  |           |         | $\delta$ (NH <sub>2</sub> ) rocking mode                            |
| 1148 ms    | 1147 ms    | 1149 m    | 1148 mw    |           |         | $\delta$ (CH) twisting mode                                         |
| 1137 mw,sh | 1137 mw,sh | 1139 w,sh | 1133 vw,sh | 1139 mw   | 1142 w  | in-plane $\delta$ (CH)                                              |
| 1107 w,sh  |            |           |            |           |         | in-plane $\delta$ (CC)                                              |
| 1087 s     | 1089 s     | 1092 ms   | 1090 m     |           |         | $\delta$ (CCC)                                                      |
| 1068 s     | 1068 w     | 1070 ms   | 1071 vw    |           |         | $\delta$ (CH) rocking mode                                          |
|            |            | 1040 m    | 1041 vw    |           | 1050 vw | in-plane $\delta$ (CC) and $\delta$ (NH <sub>2</sub> ) rocking mode |
| 1028 s     | 1030 w,sh  |           |            |           |         | $\nu$ (C-OH)                                                        |
| 1015 ms    | 1020 mw    | 1014 m    | 1018 w     | 1023 mw   |         | $\delta$ (CCC)                                                      |
|            | 1005 w     |           |            |           |         | $\nu_{as}$ (C-OH)                                                   |
|            |            | 990 w     |            | 992 vw,br |         | Ring breathing                                                      |
|            |            | 983 w,sh  |            |           | 981 vw  | Ring breathing                                                      |
| 974 vw,sh  |            |           | 970 vw,sh  |           |         | out-of-plane $\delta$ (CH)                                          |
|            | 969 mw     |           | 963 vw     |           |         | out-of-plane $\delta$ (CH)                                          |
| 950 vw,sh  | 954 w      |           |            | 956 vw    |         | $\delta$ (C-C-C)                                                    |
| 927 s      | 930 mw     | 927 m     | 927 w      |           |         | in-plane $\delta$ (C-C-C)                                           |
| 906 ms     | 907 ms     | 909 ms    |            |           |         |                                                                     |
|            |            | 904 m,sh  | 904 mw     |           |         | out-of-plane $\delta$ (COO <sup>-</sup> )                           |
|            | 871 mw     |           |            |           |         |                                                                     |
| 854 ms     | 850 w      | 851 ms    | 850 ms     | 851 w,sh  | 860 vs  | out-of-plane $\delta$ (CH)                                          |
| 835 ms     | 835 vw     | 837 m,sh  |            | 827 ms,sh | 826 w   | out-of-plane $\delta$ (CH) <sub>ring</sub>                          |

Table II. Vibrational wavenumbers of IND, AMP-IND and AMP (cont.)

| IND      |        | AMP-IND   |        | AMP       |        | Proposed Assignment                            |
|----------|--------|-----------|--------|-----------|--------|------------------------------------------------|
| IR       | Raman  | IR        | Raman  | IR        | Raman  |                                                |
| 801 ms   |        | 804 ms    | 806 vw | 817 ms    |        | $\delta(\text{C-H})$ rocking mode              |
| 769 w    | 766 vw | 776 w     | 775 vw | 776 vw    |        | out-of-plane $\delta(\text{CH})_{\text{ring}}$ |
| 753 ms   | 753 mw | 758 s     | 757 mw |           | 758 mw | ring torsion                                   |
|          |        | 751 mw,sh |        | 744 w     |        | out-of-plane $\delta(\text{CH})$               |
|          | 738 s  |           | 735 m  |           |        | in-plane $\delta(\text{C-C-C})$                |
|          |        | 722 w     |        | 715 vw,br |        | in-plane $\delta(\text{C-C-C})$                |
| 701 m    | 702 s  | 703 w     | 701 mw |           |        | ring torsion                                   |
| 691 m    |        | 689 mw    |        |           |        | $\delta(\text{COO}^-)$                         |
|          |        | 675 mw    | 676 w  |           |        | $\delta(\text{COO}^-)$                         |
| 657 ms   | 653 w  |           |        | 651 w     | 654 ms | out-of-plane $\delta(\text{C-H})$              |
| 649 m,sh | 641 w  | 640 mw    | 640 mw |           |        | out-of-plane $\delta(\text{C-H})$              |
| 629 vw   | 629 mw |           | 623 w  |           |        | in-plane ring deformation mode                 |
| 615 w    | 617 mw |           |        |           |        | $\delta(\text{CCC})_{\text{ring}}$             |
| 596 m,br |        | 600 vw    | 600 vw | 600 vw    |        | $\delta(\text{CCC})_{\text{ring}}$             |
|          | 586 w  | 587 vw    | 585 vw |           |        |                                                |
| 563 m    | 562 w  | 565 mw    | 565 w  |           |        | in-plane $\delta(\text{CCN})$                  |
| 537 mw   | 543 w  | 543 w     |        | 543 vw    |        | $\delta(\text{CCC})$                           |
|          | 520 vw | 518 mw    |        | 518 m,br  | 522 vw | out-of-plane $\delta(\text{CNC})$              |
| 496 w,sh | 499 w  | 509 w,sh  |        | 496 vw    |        | in-plane $\delta(\text{CC})_{\text{chain}}$    |
| 483 ms   | 480 vw | 482 mw    | 482 mw |           | 488 m  | ring torsion                                   |
|          |        | 478 w,sh  |        | 478 w,br  |        | NH <sub>2</sub> wagging                        |
| 469 mw   | 469 w  | 459 vw    | 456 w  | 459 w,sh  |        | ring torsion                                   |
| 432 m    | 430 w  | 428 w     | 430 w  | 428 mw    | 430 mw | out-of-plane $\delta(\text{CCC})$              |
| 413 w    | 418 ms |           | 415 mw | 416 mw    |        | out-of-plane $\delta(\text{CCC})$              |
|          |        |           |        | 412 mw    |        | out-of-plane $\delta(\text{C-NH}_2)$           |
|          | 399 ms |           | 404 mw |           |        | ring deformation                               |

Table II. Vibrational wavenumbers of IND, AMP-IND and AMP (cont.)

| IND |        | AMP-IND |        | AMP |        | Proposed Assignment                                              |
|-----|--------|---------|--------|-----|--------|------------------------------------------------------------------|
| IR  | Raman  | IR      | Raman  | IR  | Raman  |                                                                  |
|     | 351 w  |         | 362 w  |     |        | ring deformation                                                 |
|     |        |         | 322 vw |     | 323 mw | out-of-plane $\delta(\text{C-NH}_2)$ and $\delta(\text{C-CH}_3)$ |
|     | 308 w  |         | 309 vw |     |        |                                                                  |
|     | 269 s  |         | 272 m  |     |        | $(\text{CH}_3)\tau$                                              |
|     | 230 mw |         | 232 vw |     |        | skeletal deformation                                             |
|     | 196 m  |         | 211 vw |     |        | skeletal deformation                                             |
|     | 147 s  |         | 146 s  |     |        | skeletal deformation                                             |

br, m, s, sh, w and v stand for broad, medium, strong, shoulder, weak and very, respectively and  $\nu$ ,  $\delta$  and  $\tau$  stand for stretching, deformation and torsional respectively.
